# Supplementary material for: Effects of dietary supplementation with 2-hydroxy-4-(methylthio) butanoic acid isopropyl ester on ileal microbiota and metabolism in Liaoning cashmere goats
Source: Research Square preprint supplement (doi:10.21203/rs.3.rs-8062149/v1), 2025-11-25
Supplement: Supplementary file 1 [file af3f3978b4b54201bce8c55d.docx]

**Table S1 The ingredients and nutrient composition of the basal diet.**

| Ingredient | (%) | Nutrient composition1 |  |
| --- | --- | --- | --- |
| Alfafa | 25 | ME（MJ/Kg) | 8.67 |
| Peanut vine | 45 | CP（%） | 11.89 |
| Corn | 18 | Ca（%） | 0.88 |
| Soybean meal | 6 | P（%） | 0.34 |
| Wheat bran | 4.5 | NDF（%） | 43.95 |
| Salt | 0.5 | ADF（%） | 28.37 |
| Dicalcium phosphate | 0.5 |  |  |
| Premix | 0.5 |  |  |
| Total | 100 |  |  |

1 The calculated value of metabolizable energy and the measured value of other nutrients.

**Table S2 Effects of 2-Hydroxy-4-(methylthio)butanoic acid isopropyl ester (HMBi) supplementation on growth performance of Cashmere goats (n=7).**

| Items | Group | | SEM | *P* value |
| --- | --- | --- | --- | --- |
| CON | HMBi |
| FBW (kg) | 30.59 | 32.62 | 1.943 | 0.620 |
| ADG (g) | 87.87 | 119.07 | 6.34 | 0.106 |
| F/G | 12.01 | 8.99 | 1.017 | 0.151 |
